# Supplementary material for: TREM-2 serves as a negative immune regulator through Syk pathway in an IL-10 dependent manner in lung cancer
Source: PubMed Central journal article supplement (PMC5045421; doi:10.18632/oncotarget.8813), 2016-04-18
Supplement: oncotarget-07-29620-s001.pdf [file oncotarget-07-29620-s001.pdf]

## SUPPLEMENTARY FIGURE

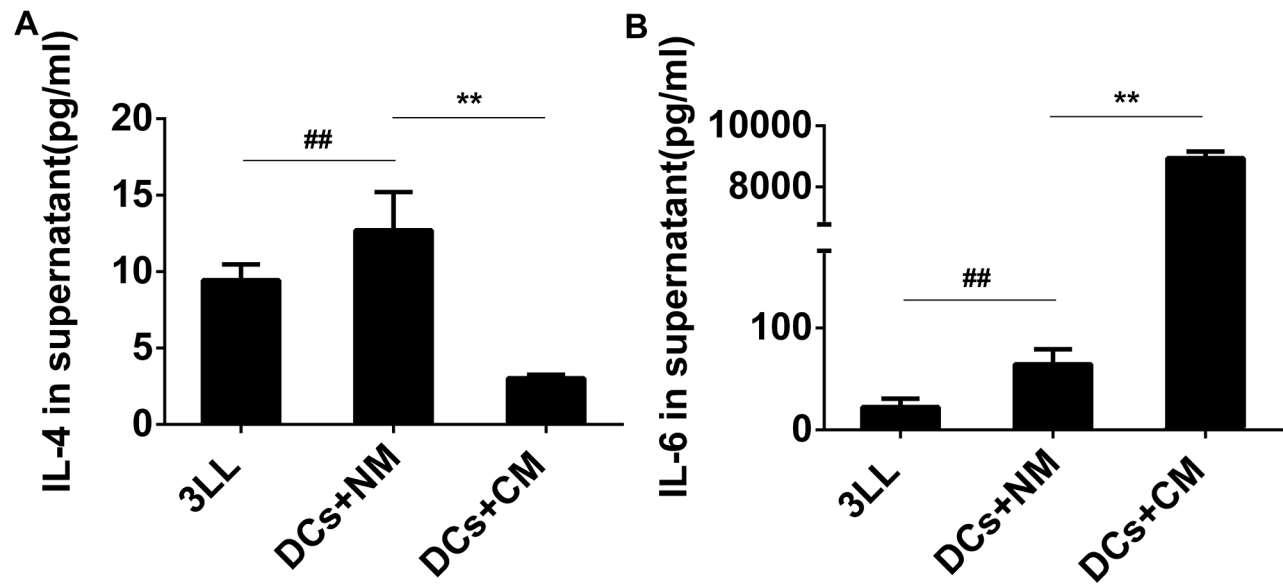

**Supplementary Figure S1: The levels IL-4 A. and IL-6 B. of supernatant from 3LL, DCs+NM and DCs+CM (day 9) were detected by ELISA. Mean  $\pm$  SEM of triplicate wells from one representative experiment out of three was shown. #  $p < 0.01$  compared with 3LL groups, \*\*  $p < 0.01$  compared with DCs+NM.**
